# Supplementary material
Source: PubMed Central journal article supplement (PMC4285994)

Fig. S1

Supplementary Table 1. Primers used in this study.

| Primer Name | Description                                                             | Sequence 5' to 3' Direction                        | Source |
|-------------|-------------------------------------------------------------------------|----------------------------------------------------|--------|
| BP22        | Outside Primer (Forward) for ToxT insertion in pBAD33 ( <i>Xba</i> I)   | GCTCTAGATTTAGGATACATTTTTATGATTGGGAAAAAATCTTTTCAAAC | 1      |
| BP195       | Outside Primer (Reverse) for ToxT insertion in pBAD33 ( <i>Pst</i> I)   | GATCCTGCAGTTAATGATGATGATGATGATGTTTTCTGCAACTCCTGTGC | 1      |
| BP171       | Outside Primer (Forward) for ToxT insertion in pMAL-c2e ( <i>Kpn</i> I) | GACAAGGTACCGATGATTGGGAAAAAATCTTTTCAAAC             | 1      |
| BP172       | Outside Primer (Reverse) for ToxT insertion in pMAL-c2e ( <i>Pst</i> I) | GATCCTGCAGTTATTTTTCTGCAACTCCTGTCAAAC               | 1      |
| JT96        | G100A Inside Primer (Reverse) Pair with BP22 or BP171                   | CCTTATCATGAGATCAGCAAGAATGTAAGATTTAG                | 2      |
| JT97        | G100A Inside Primer (Forward) Pair with BP195 or BP172                  | CTAAAATCTTACATTCTTGCTGATCTCATGATAAGG               | 2      |
| JT98        | D101A Inside Primer (Reverse) Pair with BP22 or BP171                   | CTATATAAATTCCTTATCATGAGAGCACCAAGAATGTAAG           | 2      |
| JT99        | D101A Inside Primer (Forward) Pair with BP195 or BP172                  | CTTACATTCTTGGTGCCTCATGATAAGGAATTTATATAG            | 2      |
| JT100       | L102A Inside Primer (Reverse) Pair with BP22 or BP171                   | CTATATAAATTCCTTATCATGGCATCACCAAGAATGTAAG           | 2      |
| JT101       | L102A Inside Primer (Forward) Pair with BP195 or BP172                  | CTTACATTCTTGGTGATGCCATGATAAGGAATTTATATAG           | 2      |
| JT102       | M103A Inside Primer (Reverse) Pair with BP22 or BP171                   | CACTATATAAATTCCTTATCGCGAGATCACCAAGAATG             | 2      |
| JT103       | M103A Inside Primer (Forward) Pair with BP195 or BP172                  | CATTCTTGGTGATCTCGCGATAAGGAATTTATATAGTG             | 2      |
| JT104       | I104A Inside Primer (Reverse) Pair with BP22 or BP171                   | CACTATATAAATTCCTTGGCATGAGATCACCAAGAATG             | 2      |
| JT105       | I104A Inside Primer (Forward) Pair with BP195 or BP172                  | CATTCTTGGTGATCTCATGGCAAGGAATTTATATAGTG             | 2      |
| JT106       | R105A Inside Primer (Reverse) Pair with BP22 or BP171                   | CTTTATTTTCACTATATAAATTCGCTATCATGAGATCACC           | 2      |
| JT107       | R105A Inside Primer (Forward) Pair with BP195 or BP172                  | GGTGATCTCATGATAGCGAATTTATATAGTGAAAAATAAAG          | 2      |
| JT71        | N106A Inside Primer (Reverse) Pair with BP22 or BP171                   | CTTTATTTTCACTATATAAAGCCCTTATCATGAGATCACC           | 2      |
| JT72        | N106A Inside Primer (Forward) Pair with BP195 or BP172                  | GGTGATCTCATGATAAGGGCTTTATATAGTGAAAAATAAAG          | 2      |
| JT73        | L107A Inside Primer (Reverse) Pair with BP22 or BP171                   | GATCTTTATTTTCACTATATGCATTCCTTATCATGAGATC           | 2      |
| JT74        | L107A Inside Primer (Forward) Pair with BP195 or BP172                  | GATCTCATGATAAGGAATGCATATAGTGAAAAATAAAGATC          | 2      |
| JT108       | Y108A Inside Primer (Reverse) Pair with BP22 or BP171                   | GTAATAGATCTTTATTTTCACTAGCTAAAATTCCTTATCATGAG       | 2      |
| JT109       | Y108A Inside Primer (Forward) Pair with BP195 or BP172                  | CTCATGATAAGGAATTTAGCTAGTGAAAAATAAAGATCTATTAC       | 2      |
| JT110       | S109A Inside Primer (Reverse) Pair with BP22 or BP171                   | CAAAGTAATAGATCTTTATTTTCAAGCATATAAATTCCTTATC        | 2      |
| JT111       | S109A Inside Primer (Forward) Pair with BP195 or BP172                  | GATAAGGAATTTATATGCTGAAAAATAAAGATCTATTACTTTG        | 2      |
| JT112       | E110A Inside Primer (Reverse) Pair with BP171                           | CCAAAGTAATAGATCTTTATTTGCACTATATAAATTCCTTATC        | 2      |
| JT113       | E110A Inside Primer (Forward) Pair with BP172                           | GATAAGGAATTTATATAGTGCAAATAAAGATCTATTACTTTGG        | 2      |
| JT75        | L114A Inside Primer (Reverse) Pair with BP171                           | CATTATGTTTCAAAATCCAAAGTAATGCATCTTTATTTTAC          | 2      |
| JT76        | L114A Inside Primer (Forward) Pair with BP172                           | GTGAAAAATAAAGATGCATTACTTTGGAATGTGAACATAATG         | 2      |
| JT144       | R105K Inside Primer (Reverse) Pair with BP171                           | CTTTATTTTCACTATATAAATTCCTTATCATGAGATCACC           | 2      |
| JT145       | R105K Inside Primer (Forward) Pair with BP172                           | GGTGATCTCATGATAAAGAAATTTATATAGTGAAAAATAAAG         | 2      |
| JT146       | R105Q Inside Primer (Reverse) Pair with BP171                           | CTTTATTTTCACTATATAAATTCGTATCATGAGATCACCAAG         | 2      |
| JT147       | R105Q Inside Primer (Forward) Pair with BP172                           | CTTGGTGATCTCATGATACAGAATTTATATAGTGAAAAATAAAG       | 2      |
| JT148       | L107F Inside Primer (Reverse) Pair with BP171                           | GATCTTTATTTTCACTATAAAAAATTCCTTATCATGAGATC          | 2      |
| JT149       | L107F Inside Primer (Forward) Pair with BP172                           | GATCTCATGATAAGGAATTTTATAGTGAAAAATAAAGATC           | 2      |
| JT150       | L107S Inside Primer (Reverse) Pair with BP171                           | GATCTTTATTTTCACTATAAAGAAATTCCTTATCATGAGATC         | 2      |
| JT151       | L107S Inside Primer (Forward) Pair with BP172                           | GATCTCATGATAAGGAATTCCTTATAGTGAAAAATAAAGATC         | 2      |
| JT156       | N106F Inside Primer (Reverse) Pair with BP171                           | GATCTTTATTTTCACTATAAAAAACCTTATCATGAGATC            | 2      |
| JT157       | N106F Inside Primer (Forward) Pair with BP172                           | GATCTCATGATAAGGTTTTATATAGTGAAAAATAAAGATC           | 2      |
| JT180       | N106S Inside Primer (Reverse) Pair with BP171                           | CTTTATTTTCACTATAAAGACCTTATCATGAG                   | 2      |
| JT181       | N106S Inside Primer (Forward) Pair with BP172                           | CTCATGATAAGGTCCTTATATAGTGAAAAATAAAG                | 2      |
| JT182       | R105A, N106A Inside Primer (Reverse) Pair with BP171                    | CTTTATTTTCACTATAAAGCCGCTATCATGAGATCACCAAG          | 2      |
| JT183       | R105A, N106A Inside Primer (Forward) Pair with BP172                    | CTTGGTGATCTCATGATAGCGCTTTATATAGTGAAAAATAAAG        | 2      |
| JT184       | R105F Inside Primer (Reverse) Pair with BP171                           | CTTTATTTTCACTATAAATTTAAATATCATGAGATCACCAAG         | 2      |
| JT185       | R105F Inside Primer (Forward) Pair with BP172                           | CTTGGTGATCTCATGATTTAATTTATATAGTGAAAAATAAAG         | 2      |

1: Abuaita and Withey (24)

2: This study

Fig. S2

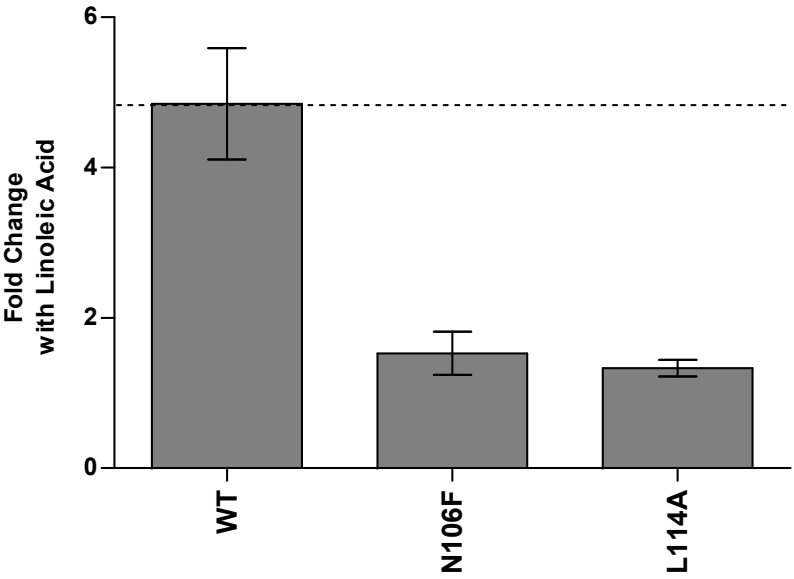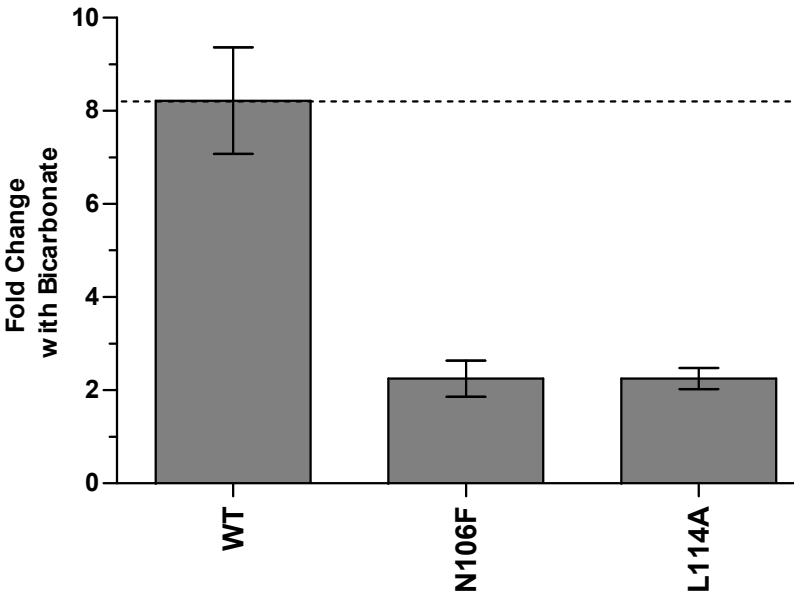

Fig. S3

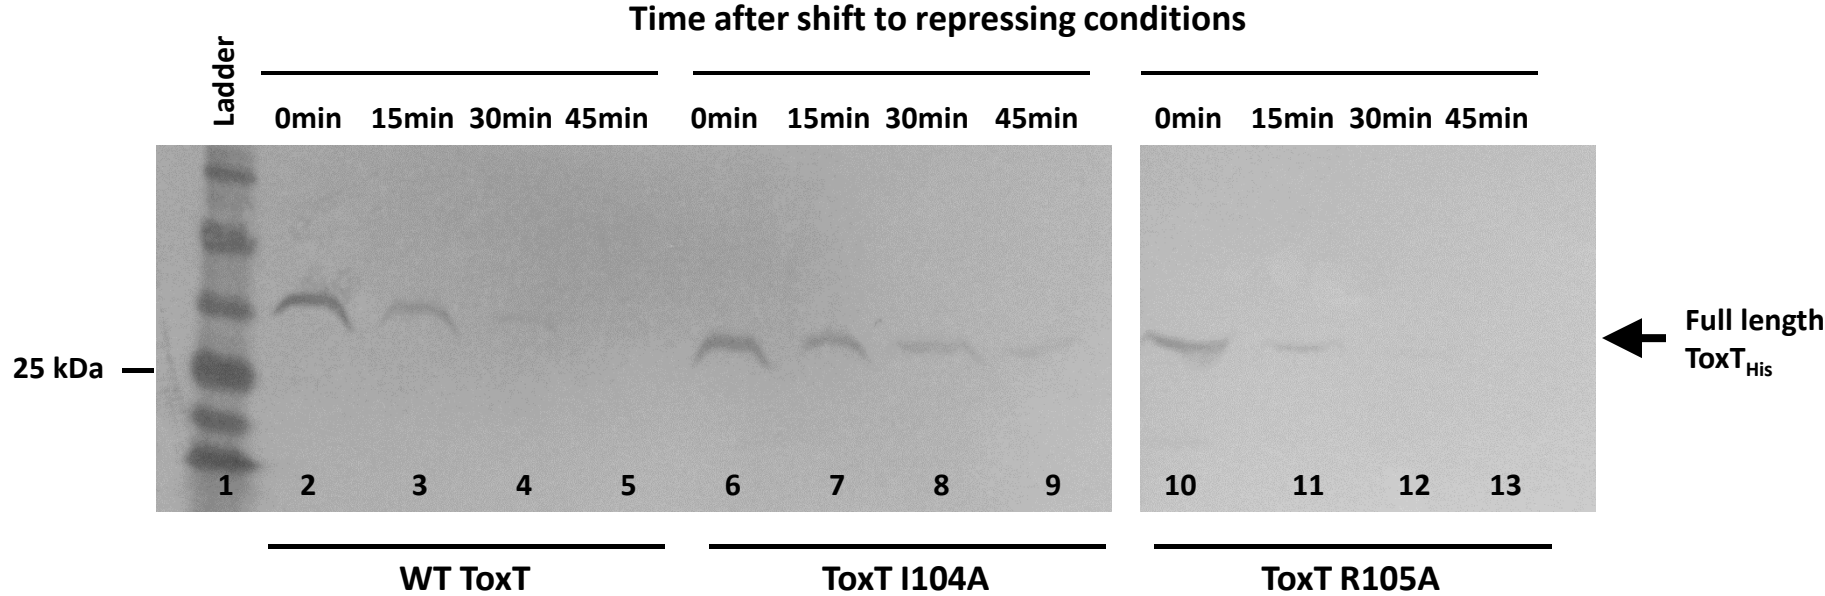

Supplement: JB.02068-14_zjb999093472so1.pdf [file JB.02068-14_zjb999093472so1.pdf]
